# Supplementary material
Source: publisher figshare collection journal article supplement (https://gsapubs.figshare.com/ndownloader/files/23300675)
Supplement: Supplementary file 1 [file 23300675]

GSA Data Repository Item **2016105** accompanies Slotznick, S.P., Winston, D., Webb, S.W., Kirschvink, J.L., and Fischer, W.W., 2016, Iron mineralogy and redox conditions during deposition of the mid-Proterozoic Appekunny Formation, Belt Supergroup, Glacier National Park, *in* MacLean, J.S., and Sears, J.W., eds., Belt Basin: Window to Mesoproterozoic Earth: Geological Society of America Special Paper 522, p. 221–242, [https://doi.org/10.1130/2016.2522\(09\)](https://doi.org/10.1130/2016.2522(09)).

TABLE DR1. DETAILED SAMPLE DATA FOR GLACIER NATIONAL PARK SAMPLES

| Sample  | GPS location |           | Formation                      | Side of park | Descriptive location                 | Lithology                                                                                                                                                                                           |
|---------|--------------|-----------|--------------------------------|--------------|--------------------------------------|-----------------------------------------------------------------------------------------------------------------------------------------------------------------------------------------------------|
|         | Lat (°N)     | Long (°W) |                                |              |                                      |                                                                                                                                                                                                     |
| GP14-8  | 48.69420     | 113.54347 | Appekunny Member 1             | East         | Going-to-the-Sun Road, St. Mary Lake | Red claystone and siltstone in even microlaminae                                                                                                                                                    |
| GP14-10 | 48.69485     | 113.54699 | Appekunny Member 1             | East         | Going-to-the-Sun Road, St. Mary Lake | Green siltstone from tabular-weathering siltstone with even couplets, near ripple cross-stratification                                                                                              |
| GP12-1  | 48.68959     | 113.55764 | Appekunny Member 2             | East         | Going-to-the-Sun Road, St. Mary Lake | Massive-weathering green siltstone with concoidal fractures, near wavy laminations and soft-sediment deformation                                                                                    |
| GP14-11 | 48.68952     | 113.55772 | Appekunny Member 2             | East         | Going-to-the-Sun Road, St. Mary Lake | Massive-weathering green siltstone near faint wavy laminations and soft-sediment deformation                                                                                                        |
| GP14-34 | 48.68609     | 113.56375 | Appekunny Member 3             | East         | Going-to-the-Sun Road, St. Mary Lake | Green siltstone with wavy laminations and silt-clay couplets, large meter-scale hummocks                                                                                                            |
| GP14-35 | 48.68449     | 113.56968 | Appekunny Member 3             | East         | Going-to-the-Sun Road, St. Mary Lake | Green siltstone in large meter-scale hummock, wavy laminations and silt-clay couplets                                                                                                               |
| GP14-29 | 48.67574     | 113.57782 | Appekunny Member 4             | East         | Sun Point, St. Mary Lake             | Grayish green interbedded siltstone and claystone with shaly parting and microlaminae, oxidized bedding planes and fractures                                                                        |
| GP14-30 | 48.67524     | 113.57734 | Appekunny Member 4             | East         | Sun Point, St. Mary Lake             | Gray siltstone and claystone in microlaminae, even couplets, and lenticular couplets with soft-sediment deformation and oxidized bedding planes                                                     |
| GP14-32 | 48.67810     | 113.58099 | Appekunny Member 5             | East         | Sun Point, St. Mary Lake             | Green claystone and siltstone in even and wavy microlaminae with mud cracks and mud chips with a few orangish laminations, near lenses of quartz sandstone                                          |
| GP14-33 | 48.67961     | 113.58194 | Appekunny Member 5             | East         | Sun Point, St. Mary Lake             | Green claystone and siltstone in even microlaminae with mud cracks, mud chips, and other soft-sediment deformation features, oxidized fractures                                                     |
| GP12-2  | 48.67411     | 113.61337 | Grinnell                       | East         | Going-to-the-Sun Road, St. Mary Lake | Red clay-rich siltstone with euhedral rhombohedral and cubic millimeter-sized pseudomorphs in siltstone-claystone even couplets with mud cracks and mud chips                                       |
| GP12-3  | 48.67374     | 113.61325 | Grinnell                       | East         | Going-to-the-Sun Road, St. Mary Lake | Red interbedded claystone and siltstone microlaminae with mud cracks, mud chips, and other soft-sediment deformation, euhedral rhombohedral and cubic millimeter-sized pseudomorphs                 |
| GP12-8  | 48.64159     | 113.85725 | Prichard or Appekunny Member 4 | West         | McDonald Creek                       | Dark-gray siltstone and claystone in even couplets and microlaminae with continuous laminae of millimeter-scale oxidizing iron sulfides                                                             |
| GP14-6  | 48.64593     | 113.83690 | Prichard or Appekunny Member 4 | West         | West Mount Brown                     | Dark-gray siltstone and claystone in even couplets and microlaminae with continuous laminae of millimeter-scale oxidizing iron sulfides                                                             |
| GP14-1  | 48.61807     | 113.83498 | Appekunny Member 4             | West         | East Mount Brown                     | Green siltstone and gray claystone in even and pinch-and-swell couplets, oxidized iron sulfides                                                                                                     |
| GP14-55 | 48.61634     | 113.84432 | Appekunny Member 4             | West         | East Mount Brown                     | Greenish gray siltstone and claystone wavy laminations with mud cracks and soft-sediment deformation and oxidized bedding planes and millimeter-sized grains, vertical millimeter-wide quartz veins |
| GP14-27 | 48.65734     | 113.83917 | Appekunny Member 5             | West         | McDonald Creek                       | Green mud chip breccia in orangish green siltstone, near even and wavy microlaminae of claystone and siltstone with mud cracks and mud chips                                                        |
| GP14-28 | 48.65857     | 113.83808 | Appekunny Member 5             | West         | McDonald Creek                       | Green claystone and siltstone in even microlaminae with mud cracks, mud chips, and other soft-sediment deformation, oxidization along fractures                                                     |
| GP14-4  | 48.61971     | 113.83451 | Appekunny Member 5             | West         | East Mount Brown                     | Massive-weathering green siltstone with microlaminae, mud cracks, mud chips, and soft-sediment deformation                                                                                          |
| GP14-54 | 48.62255     | 113.83518 | Appekunny Member 5             | West         | East Mount Brown                     | Green siltstone and claystone microlaminae with mud chips, mud cracks, and other soft-sediment deformation, vertical centimeter-wide quartz veins                                                   |
